# Supplementary material for: RNF2 regulates Wnt/ß-catenin signaling via TCF7L1 destabilization
Source: PubMed Central journal article supplement (PMC10643375; doi:10.1038/s41598-023-47111-x), 2023-11-13
Supplement: 41598_2023_47111_MOESM1_ESM.pdf [file 41598_2023_47111_MOESM1_ESM.pdf]

# Supplementary Information

15 Supplementary figures with legends

## RNF2 regulates Wnt/ $\beta$ -catenin signaling via TCF7L1 destabilization

Youngmu Koo<sup>1</sup>, Wonhee Han<sup>2</sup>, Byeong-Rak Keum<sup>1</sup>, Leila Lutz<sup>1</sup>, Sung Ho Yun<sup>3</sup>, Gun-Hwa Kim<sup>4</sup>, Jin-Kwan Han<sup>1,\*</sup>

1. Department of Life Sciences, Pohang University of Science and Technology, 77 Cheongam-Ro, Nam-Gu, Pohang, Gyeongbuk, 37673, Korea.

2. F. M. Kirby Neurobiology Center, Boston Children's Hospital, Department of Neurology, Harvard Medical School, Boston, MA 02115, USA.

3. Center for Research Equipment, Korea Basic Science Institute, Cheongju 28119, Republic of Korea

4. Research Center for Bioconvergence Analysis, Korea Basic Science Institute, Cheongju 28119, Republic of Korea

\* Corresponding author: [jkh@postech.ac.kr](mailto:jkh@postech.ac.kr)

# Figure S1

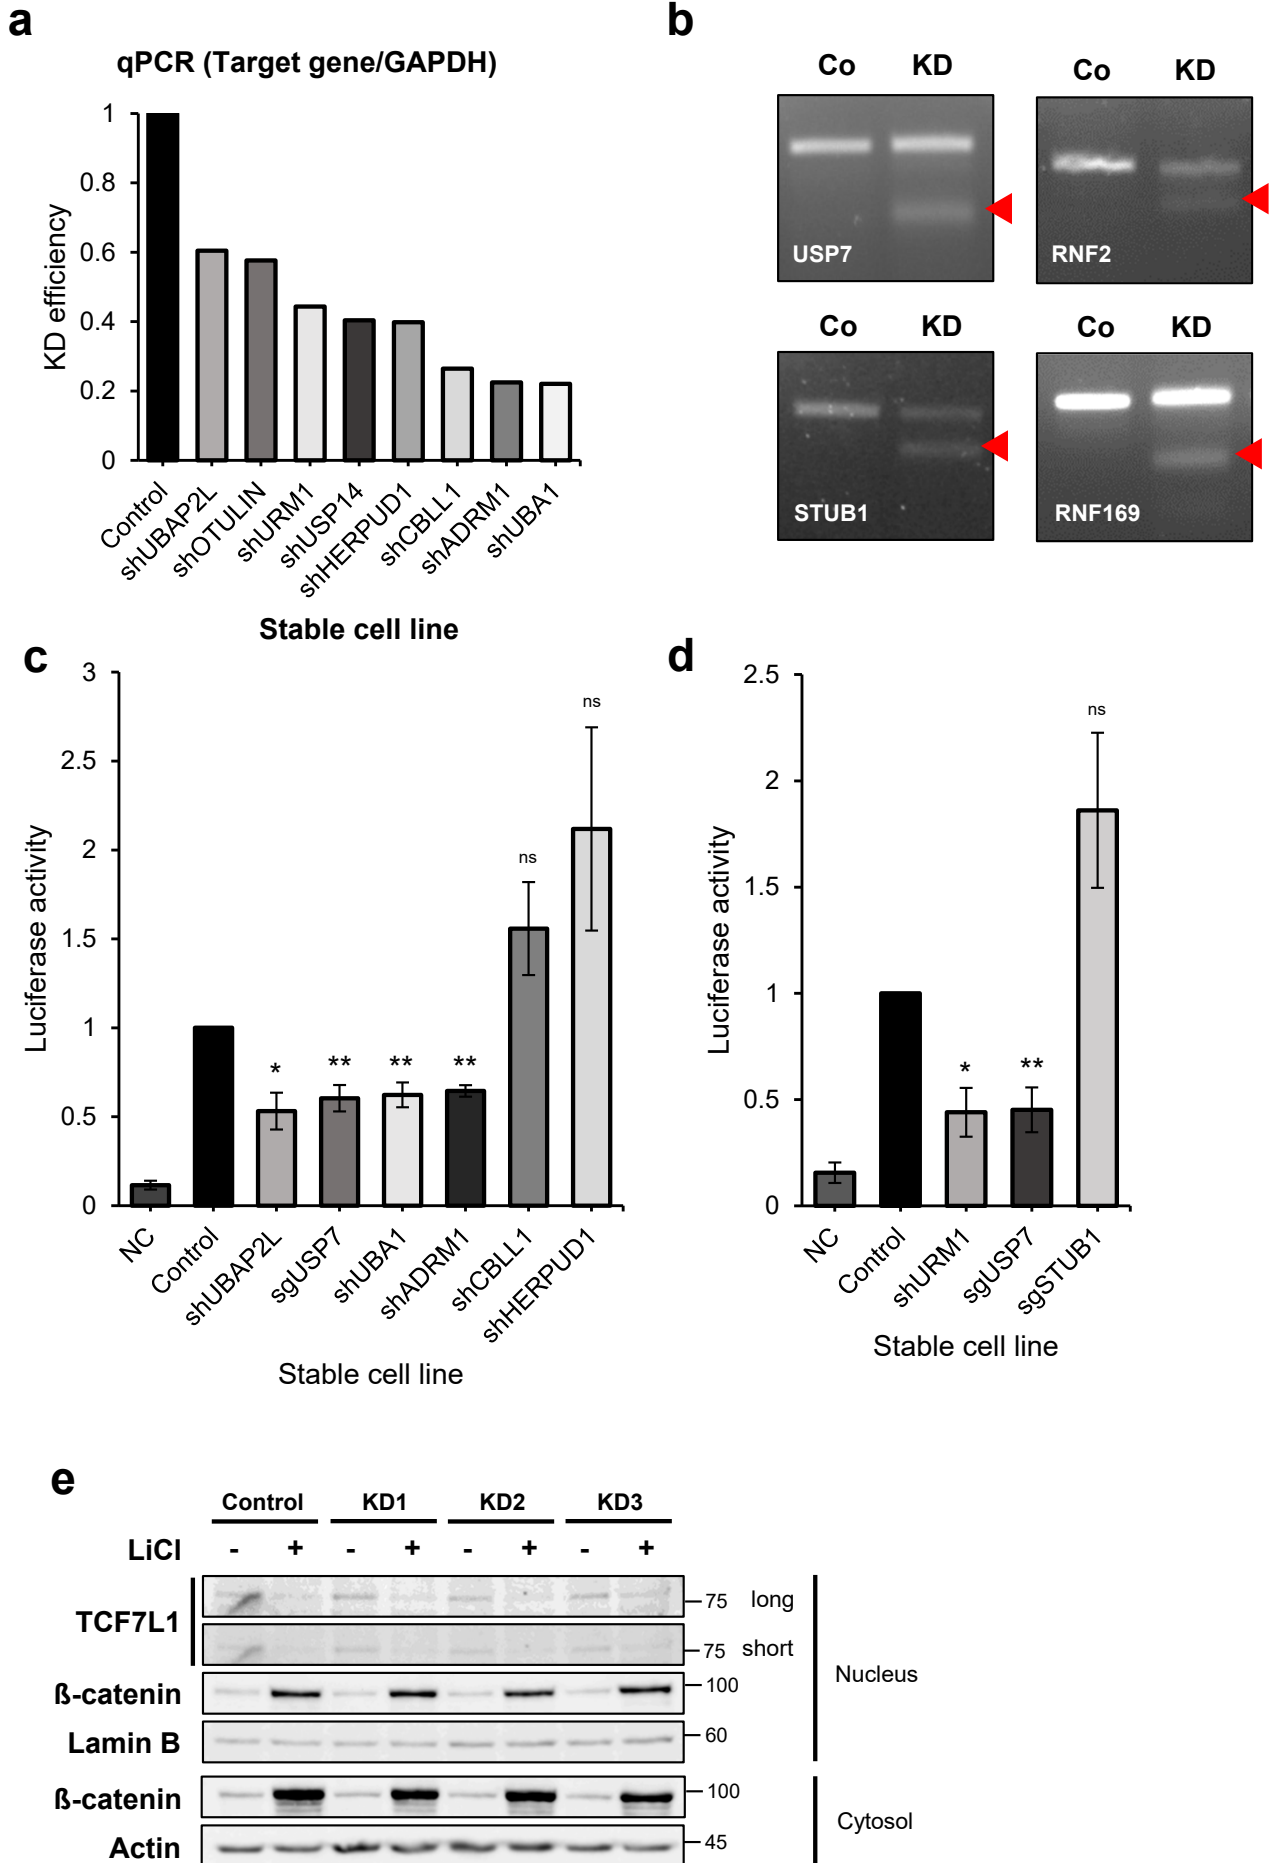

# Figure S2

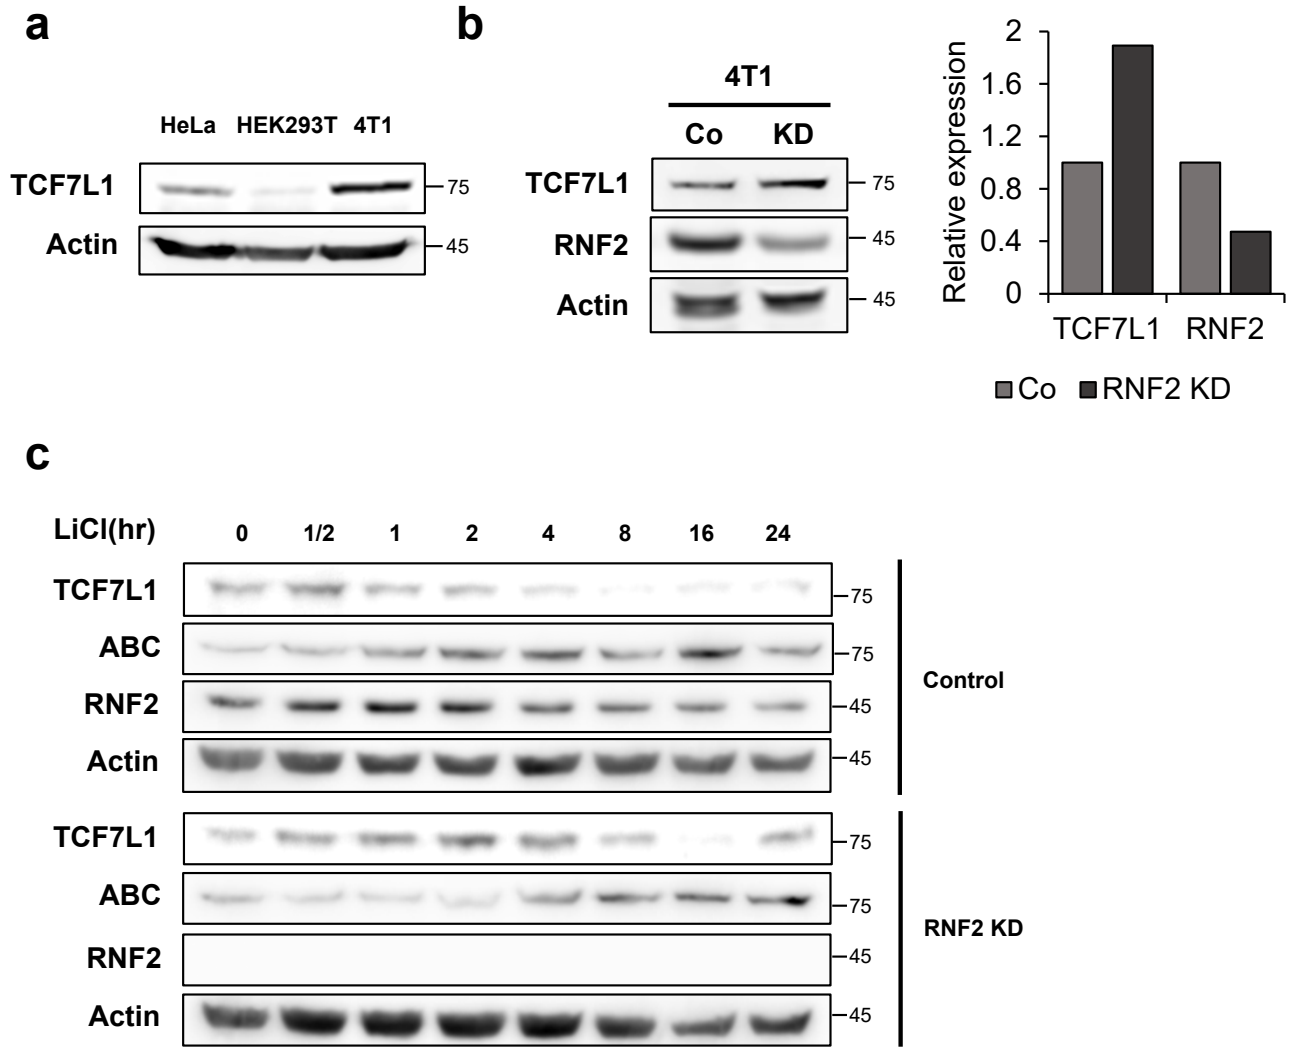

# Figure S3

**a**

|           |   |   |   |   |   |   |
|-----------|---|---|---|---|---|---|
| TCF7L1-HA | + | + | + | + | + | + |
| myc-RNF2  | - | - | + | - | - | + |
| Flag-Ub   | - | + | + | - | + | + |
| LiCl      | - | - | - | + | + | + |
| MG132     | + | + | + | + | + | + |

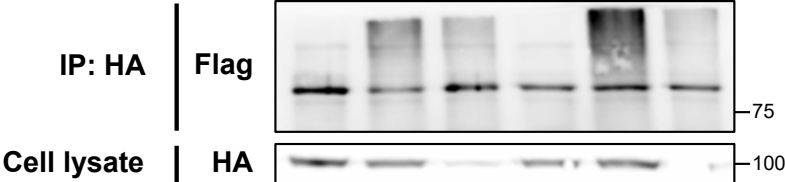

# Figure S4

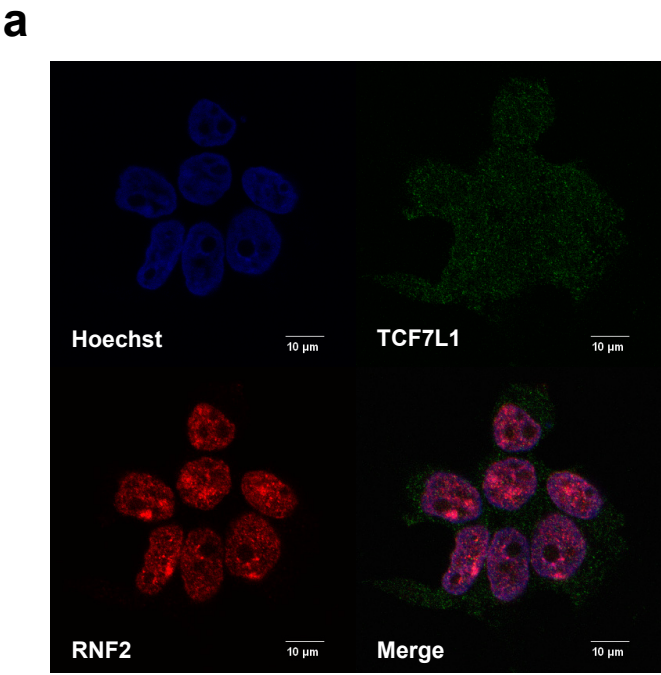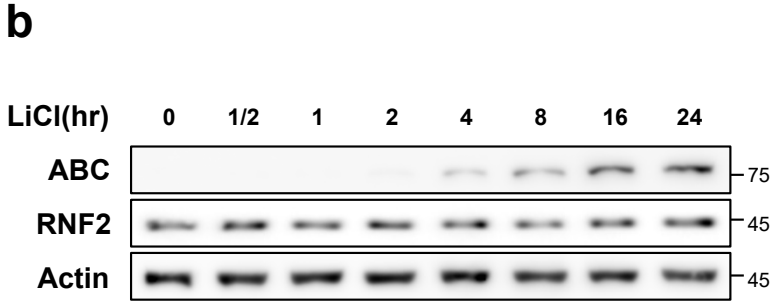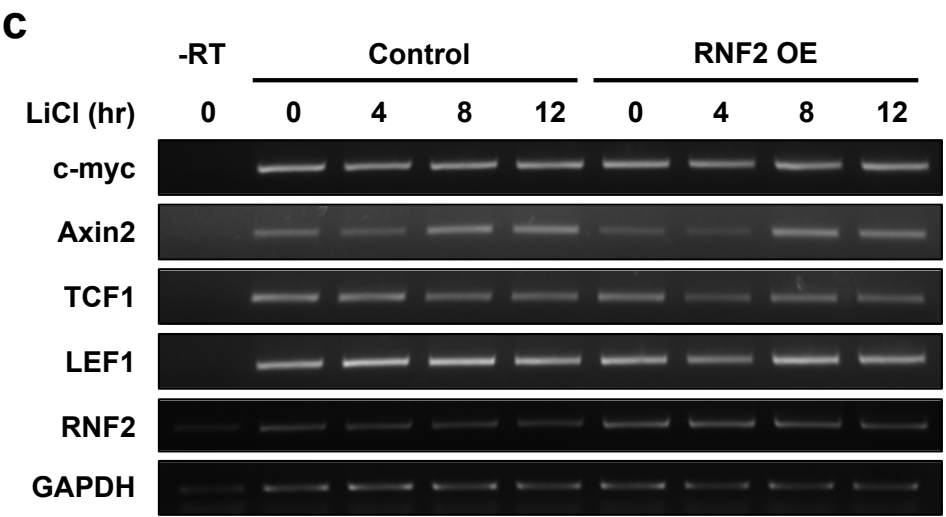

# Figure S5

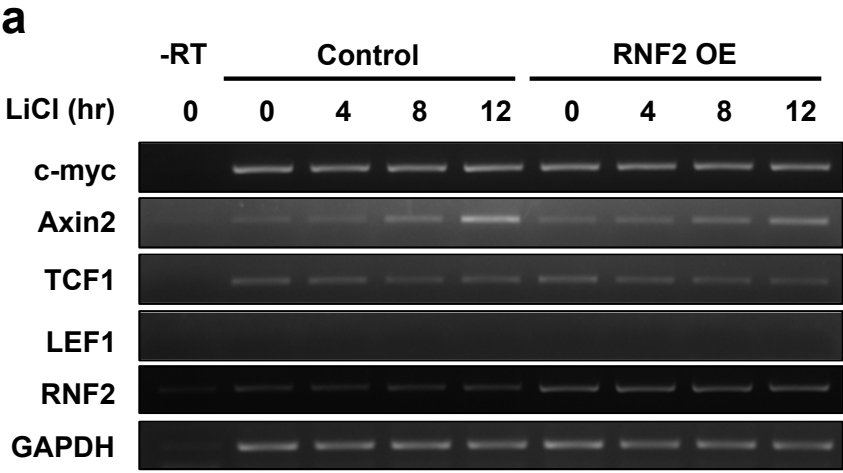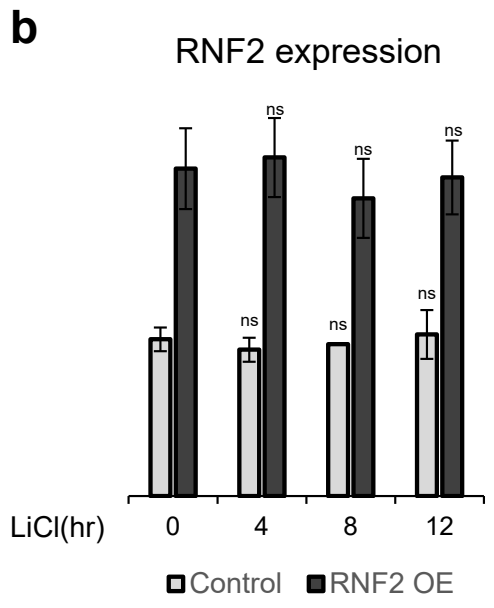

# Figure S6

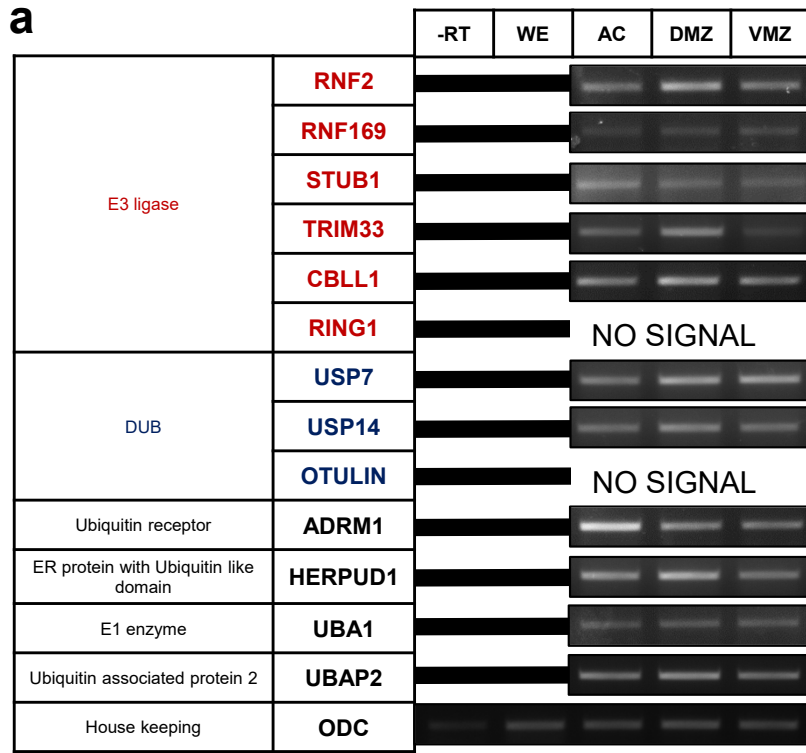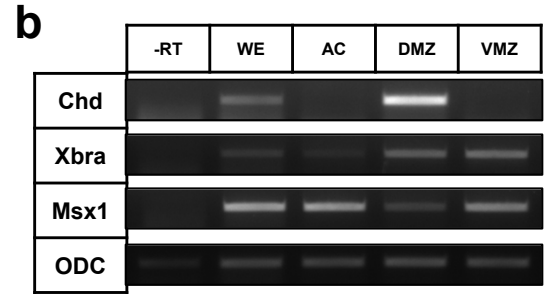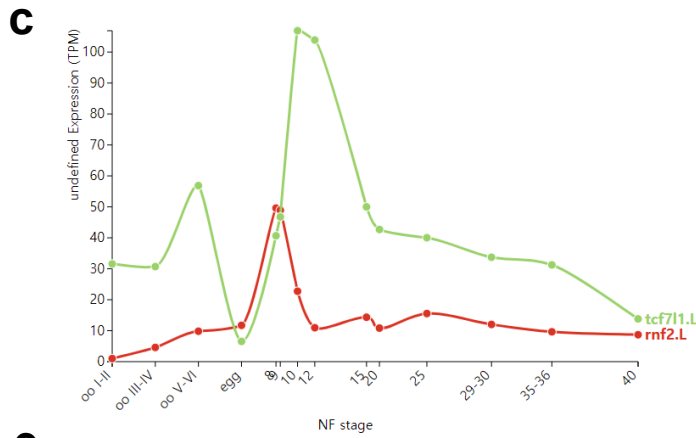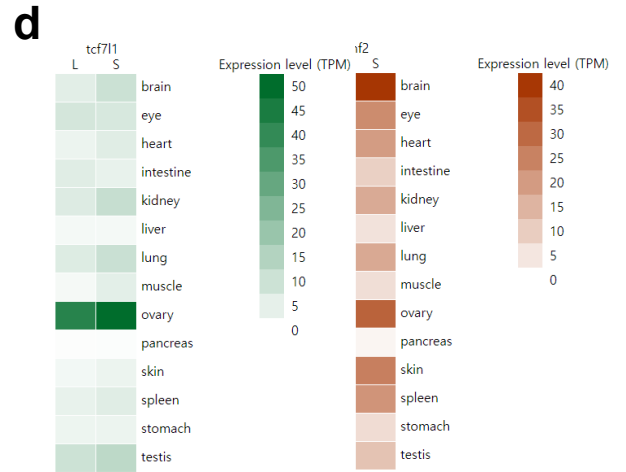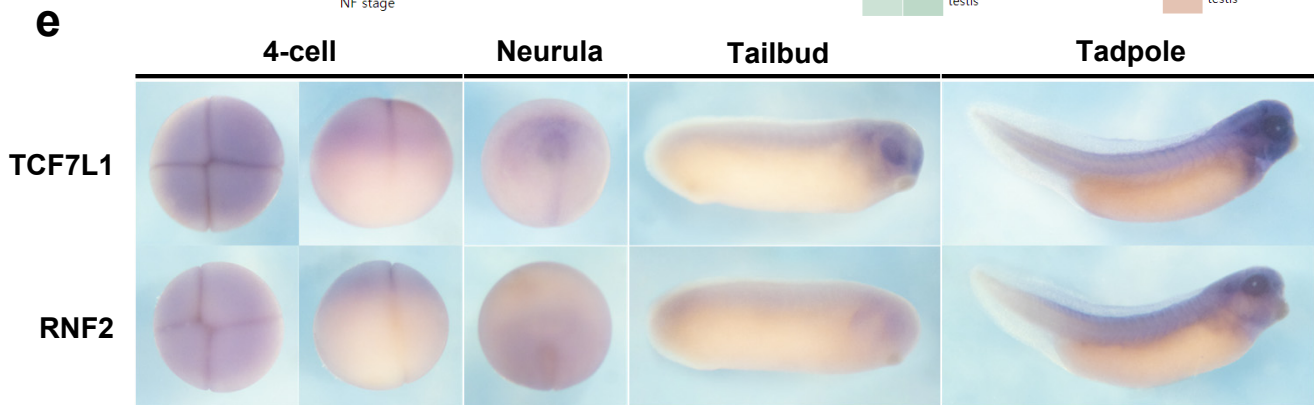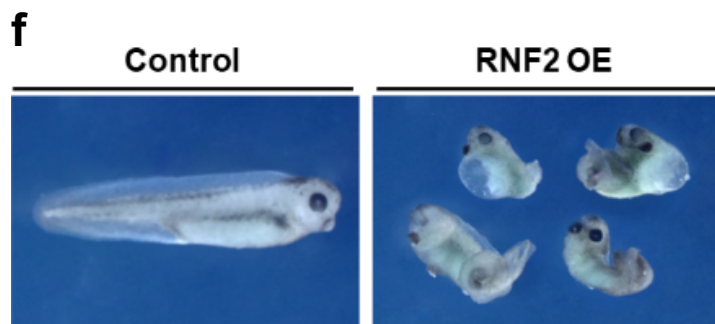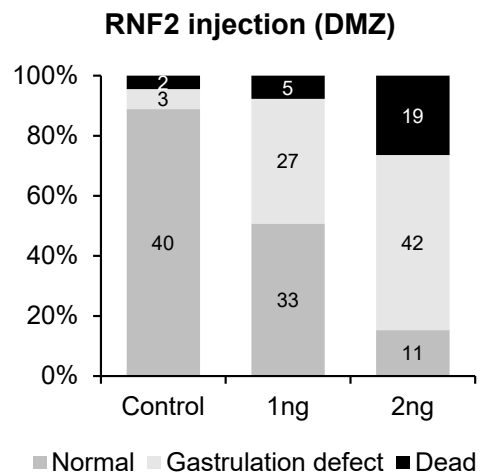

# Figure S7

## Figure 1a

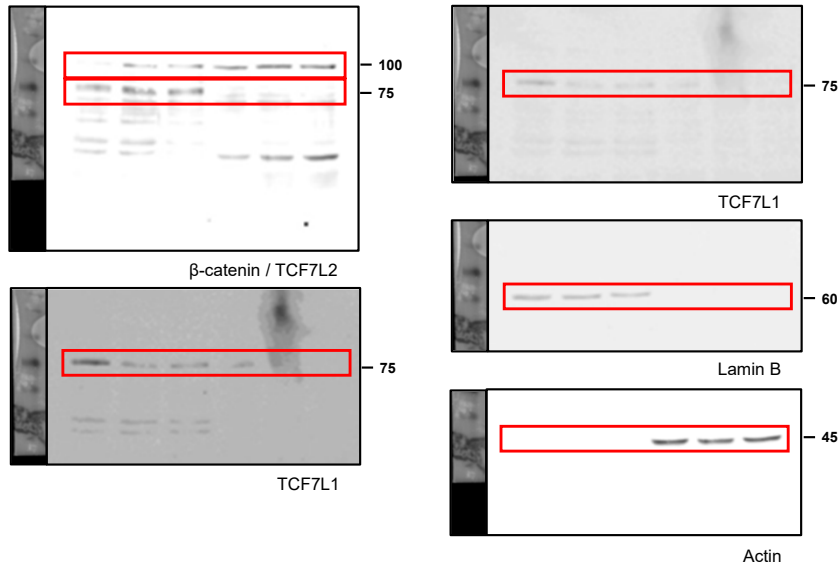

## Figure 1b

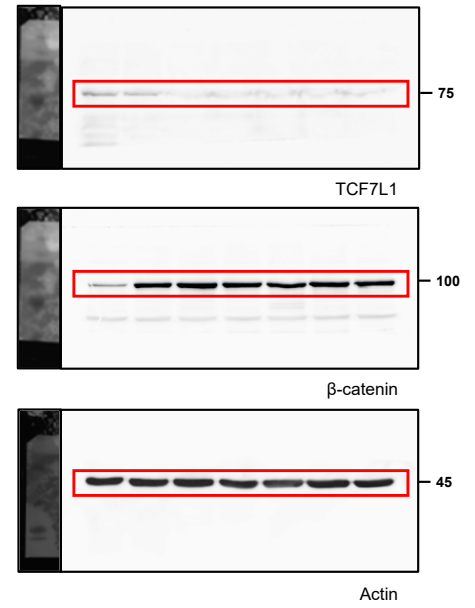

## Figure 1c

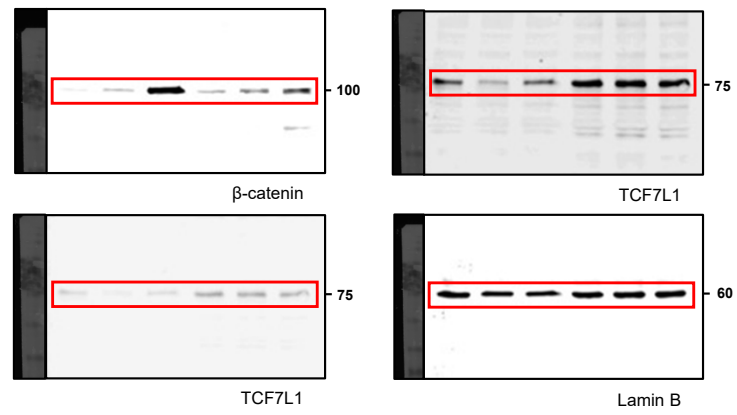

## Figure 1d

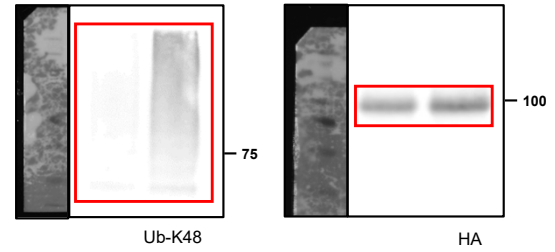

## Figure 3a

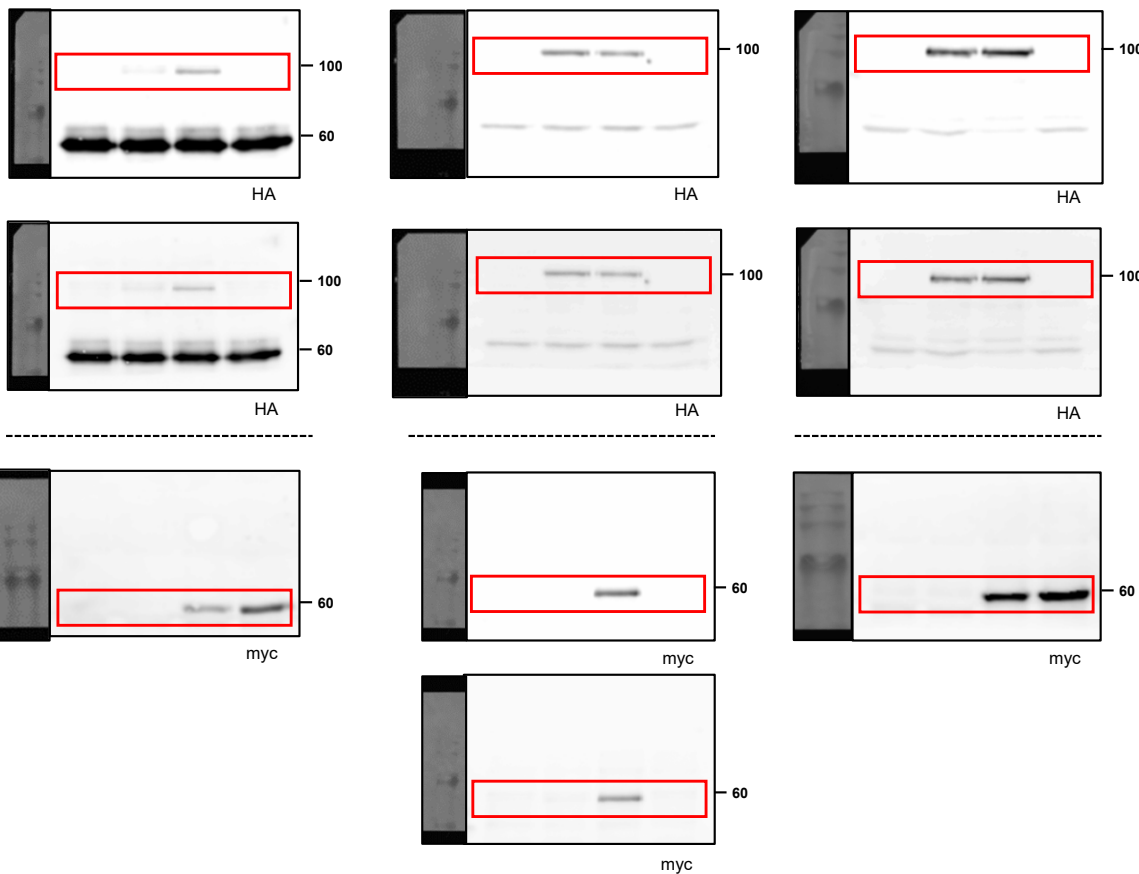

## Figure 3c

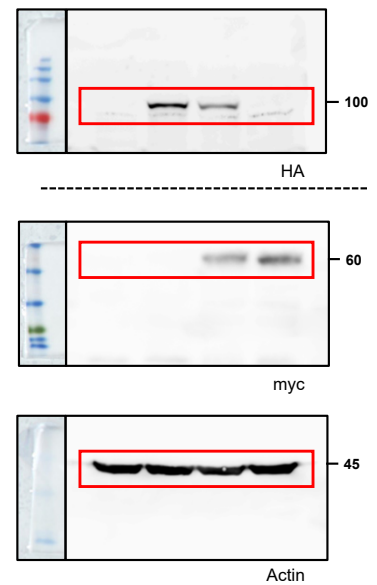



# Figure S8

## Figure 3d

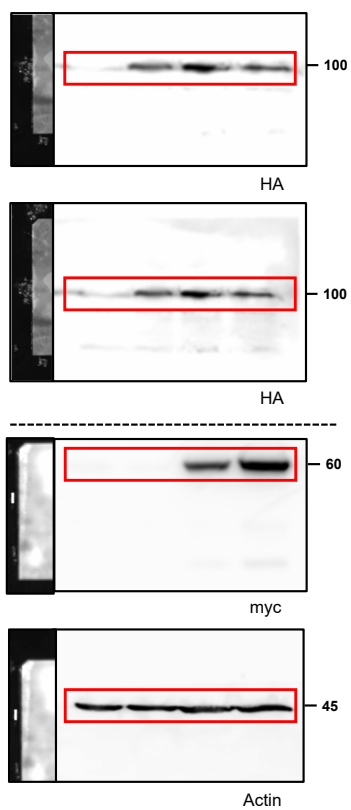

## Figure 3e

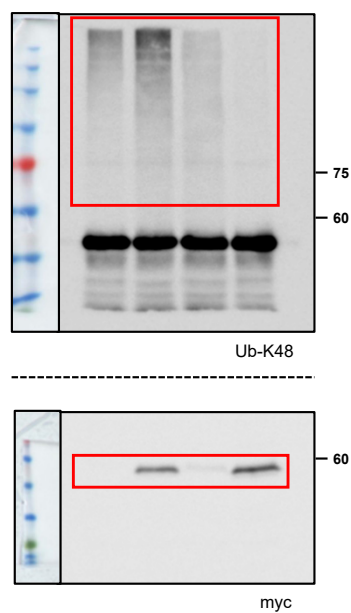

## Figure 3f

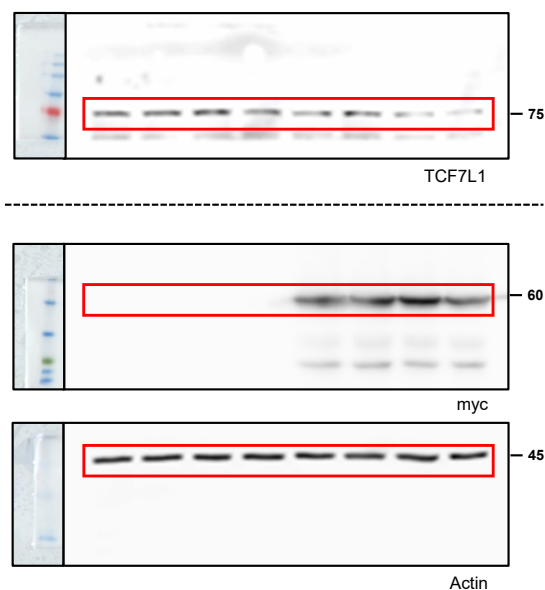

## Figure 4a

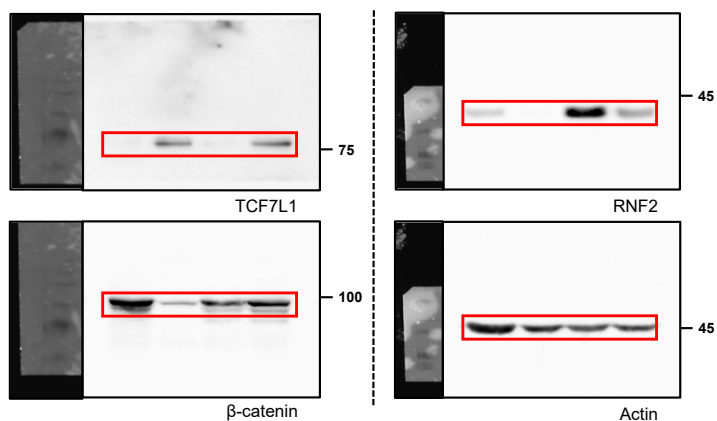

## Figure 4b

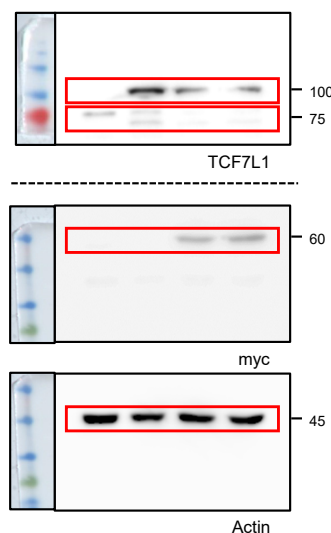

## Figure 4e

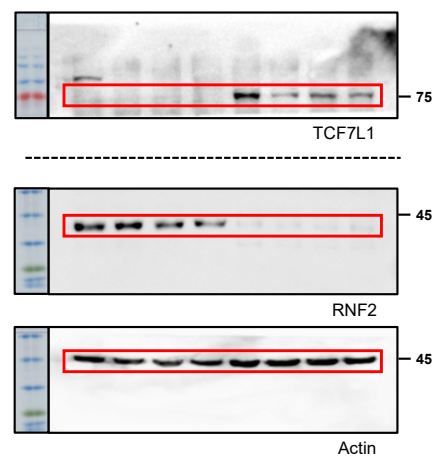

## Figure 4f

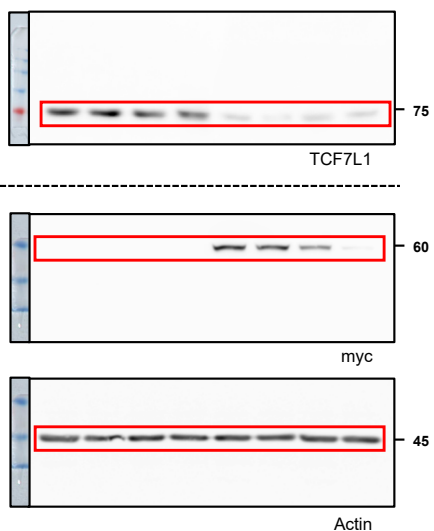

## Figure 4g

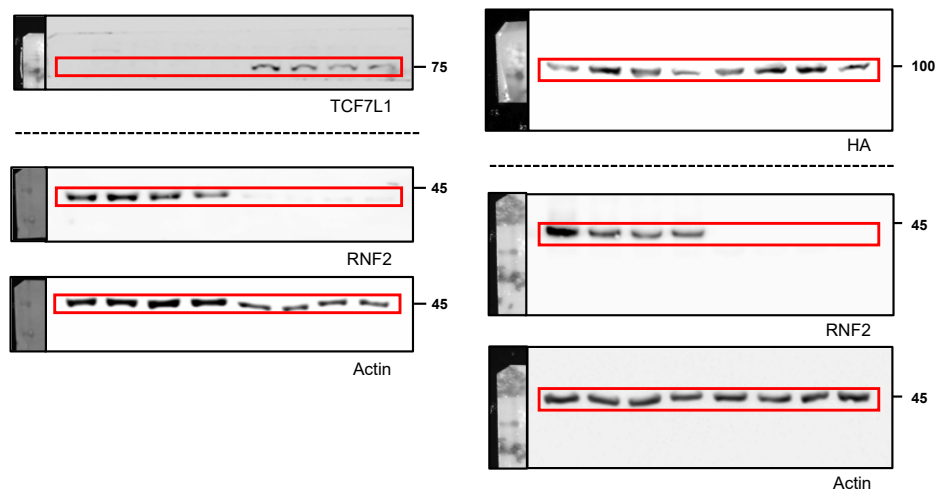

# Figure S9

## Figure 4h

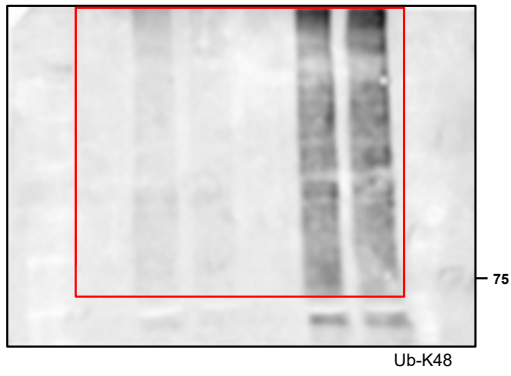

## Figure 5a

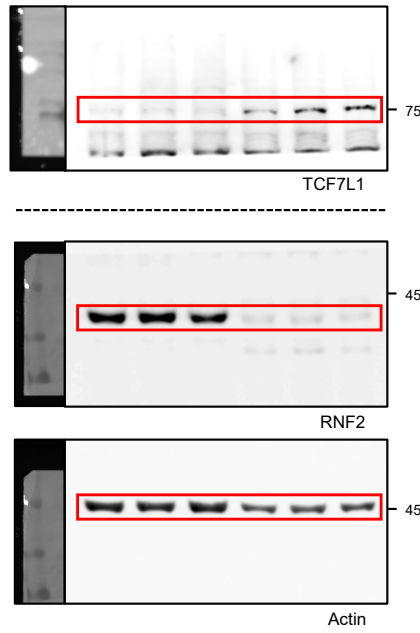

## Figure 5b

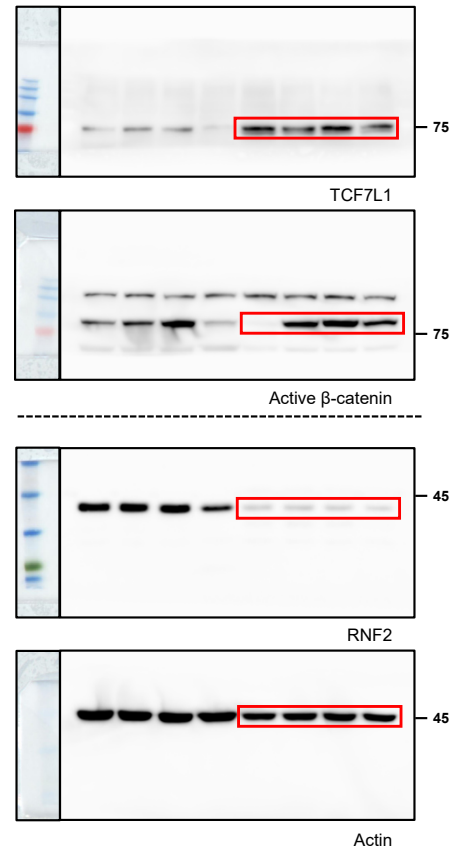

## Figure 5c

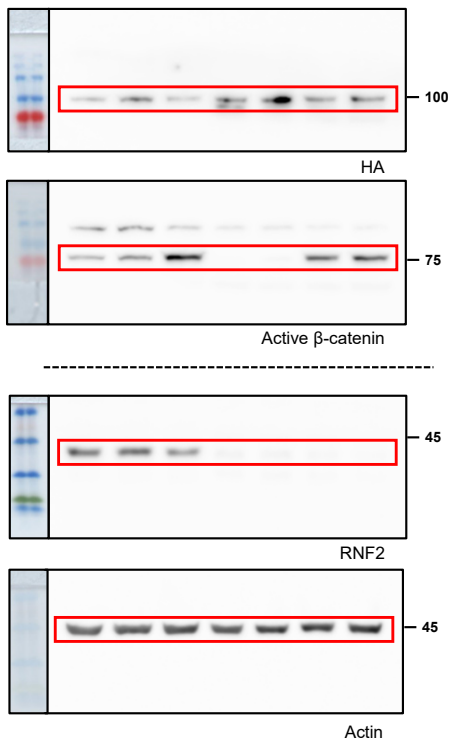

## Figure 5e

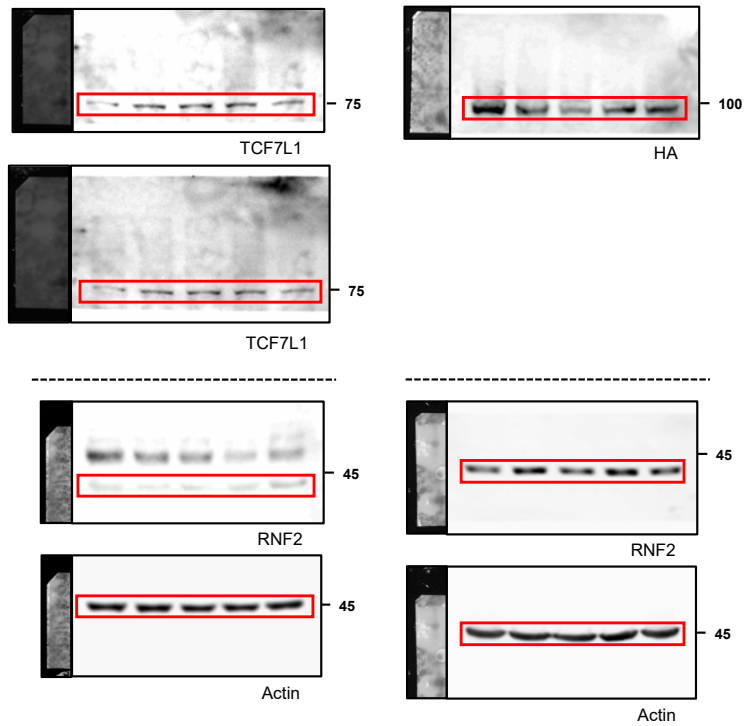

## Figure 5f

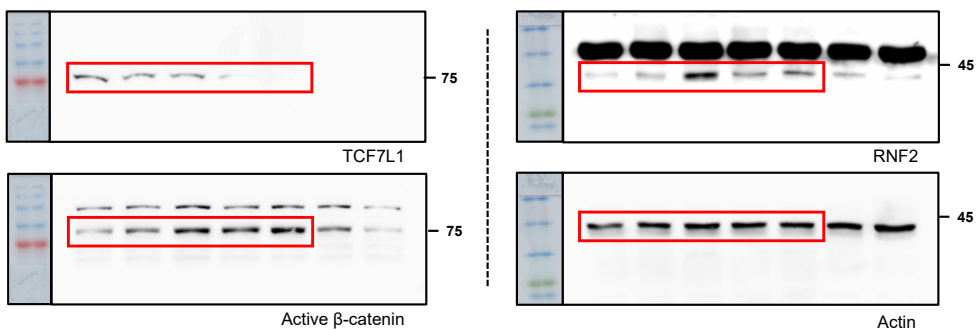

# Figure S10

## Figure 5g

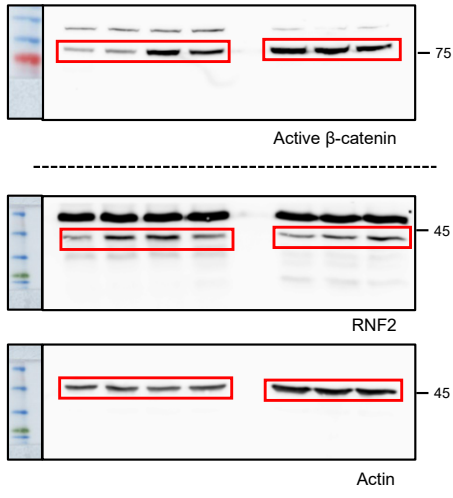

## Figure 5h

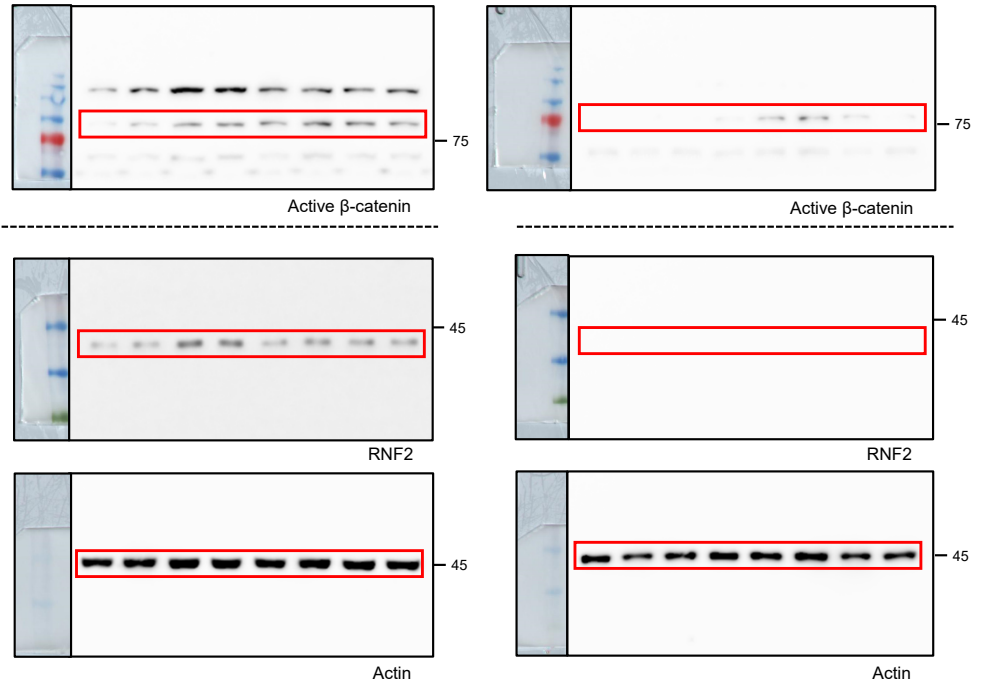

## Figure 6b

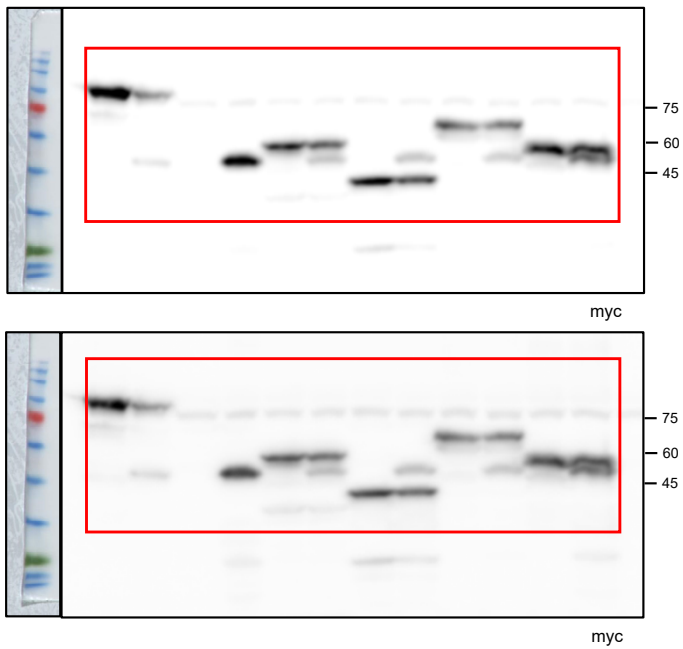

# Figure S11

Figure 3b

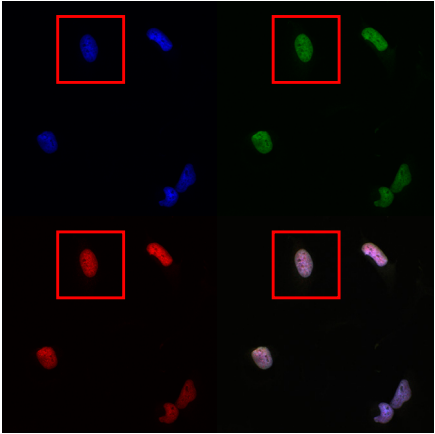

Figure 4c

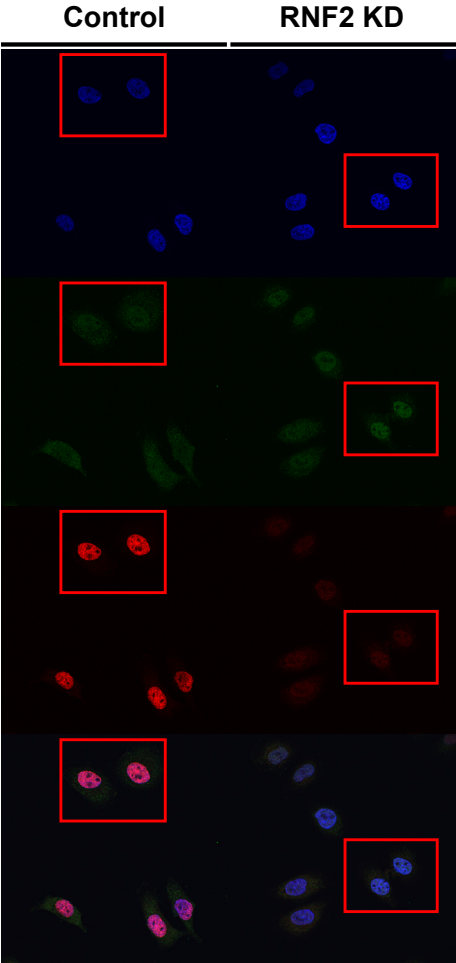

Figure 4d

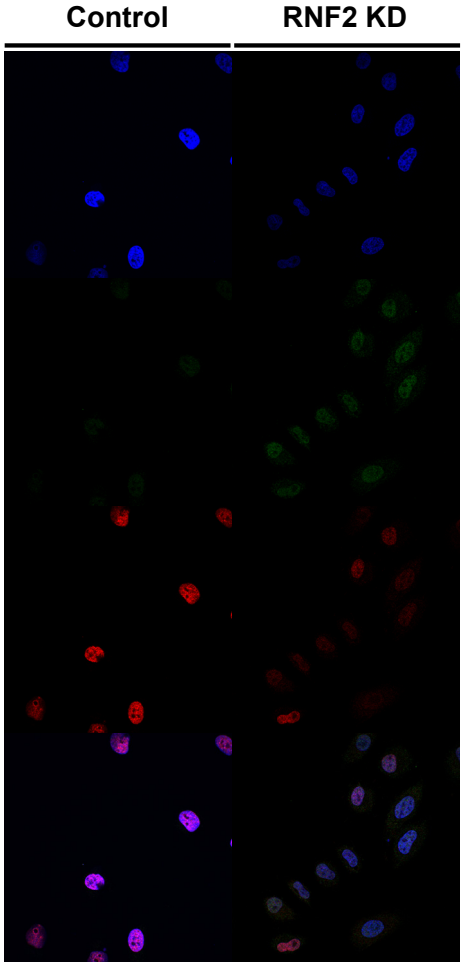

# Figure S12

Figure 5d

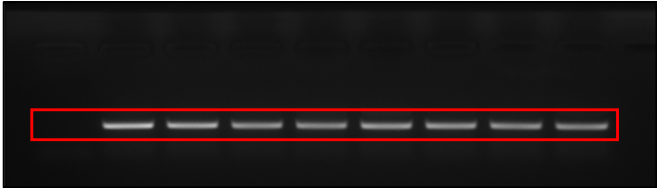

c-myc

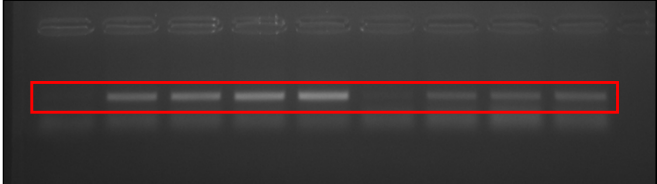

Axin2

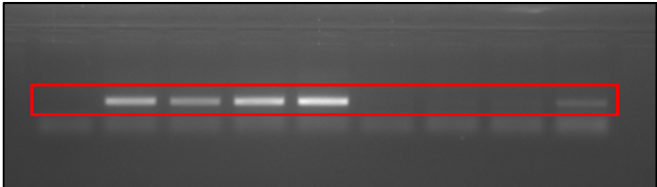

TCF1

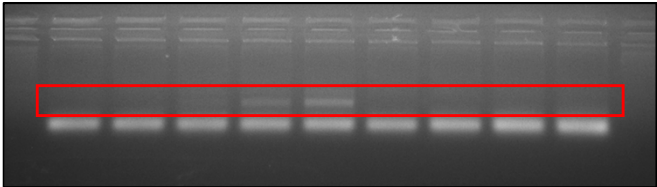

LEF1

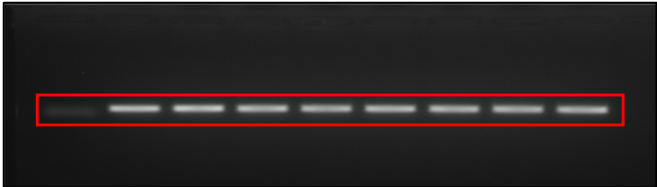

GAPDH

# Figure S13

## Figure S1e

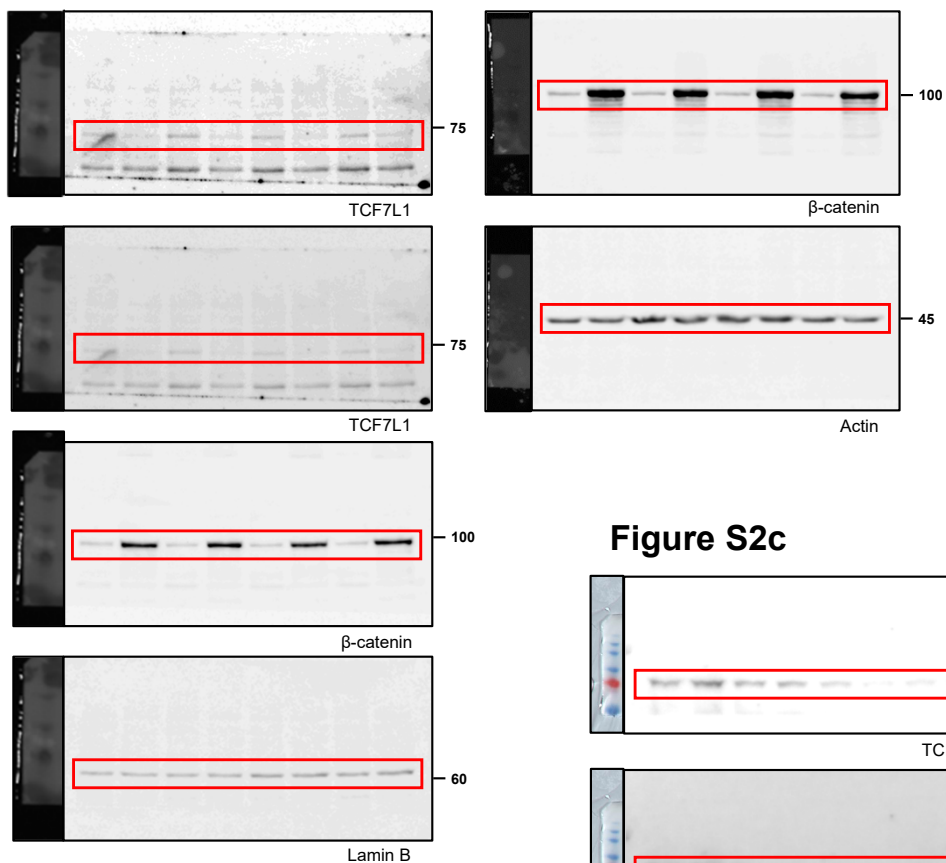

## Figure S2a

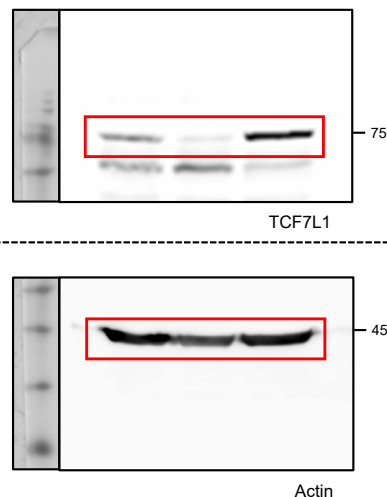

## Figure S2c

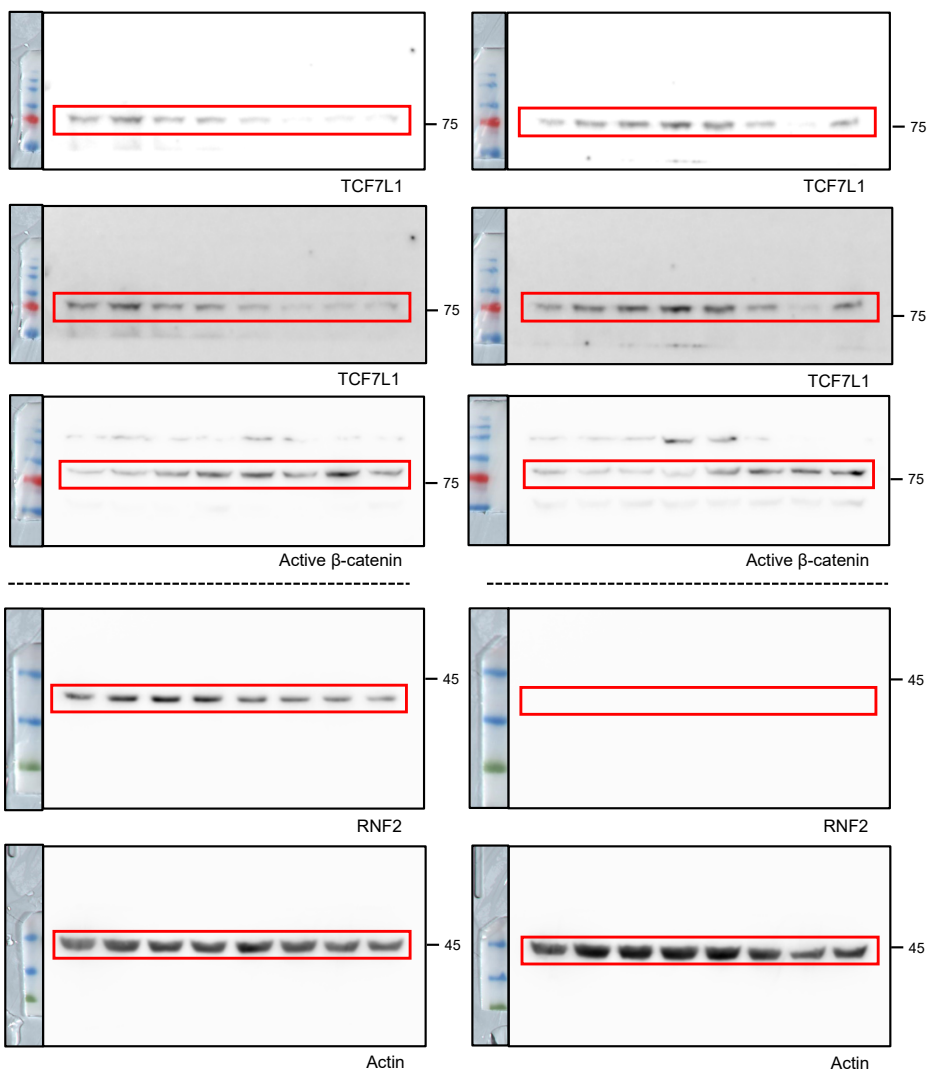

## Figure S3a

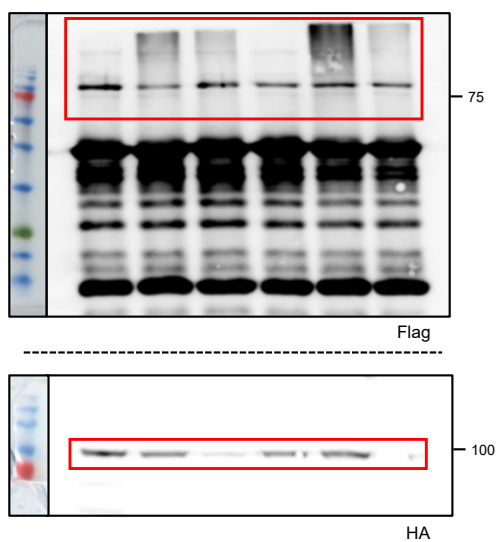

## Figure S4b

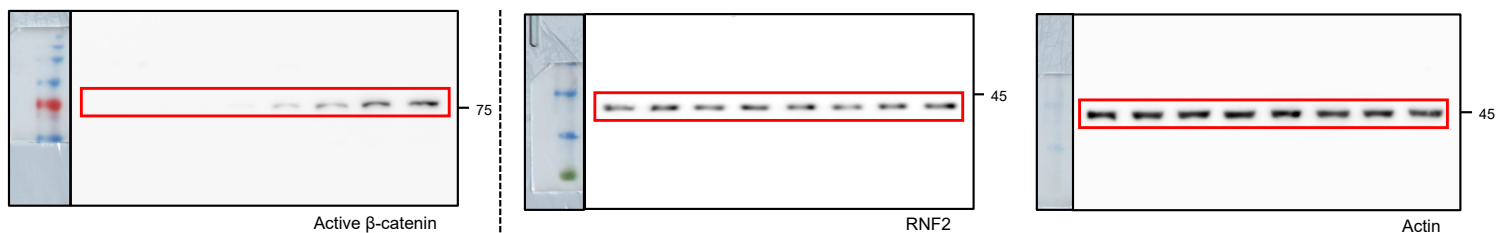

# Figure S14

## Figure S1b

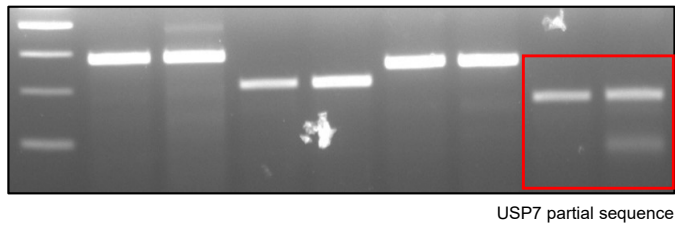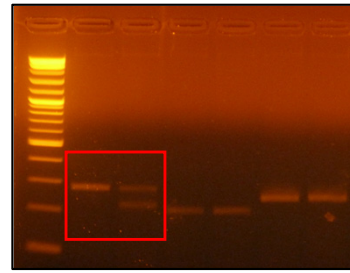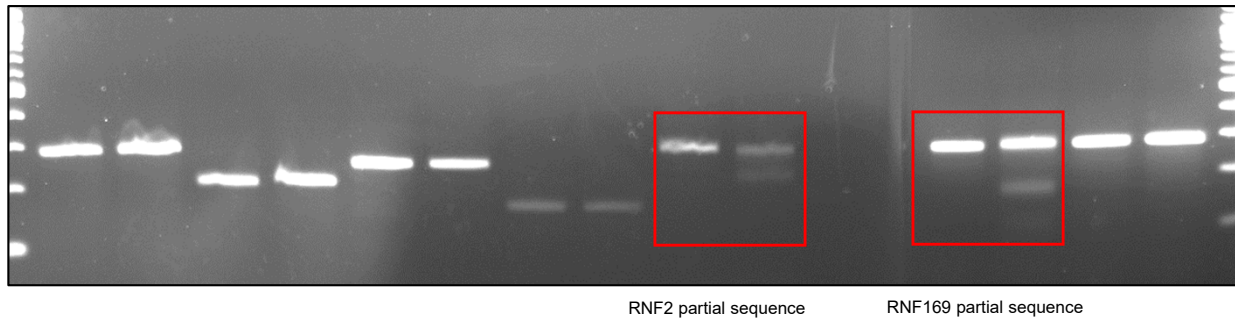

## Figure S4c

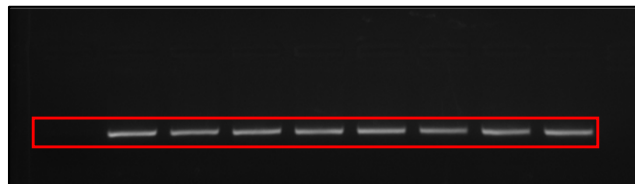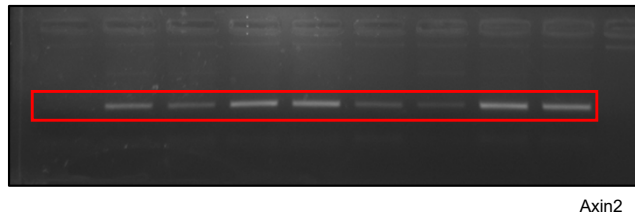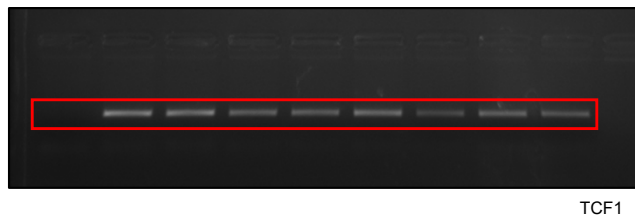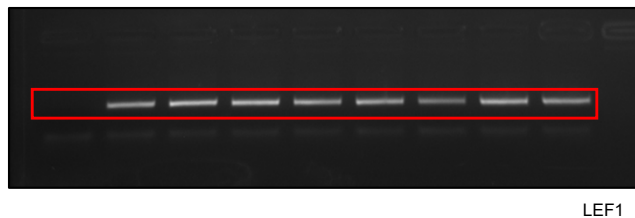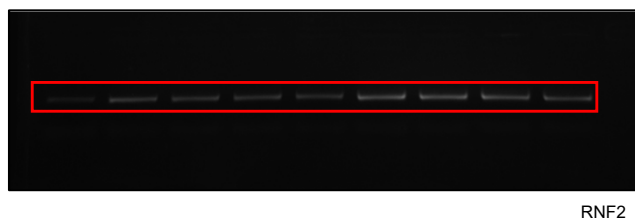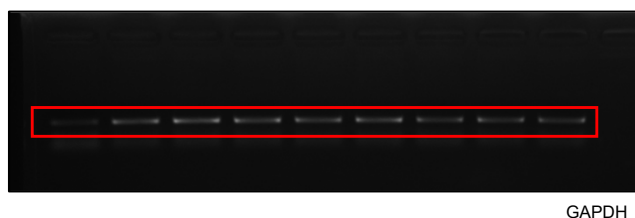

## Figure S5a

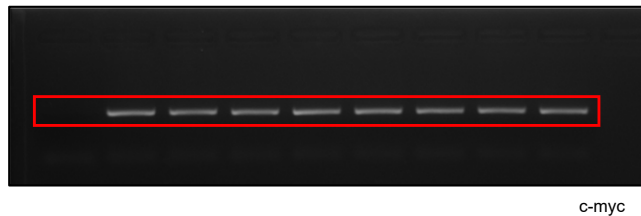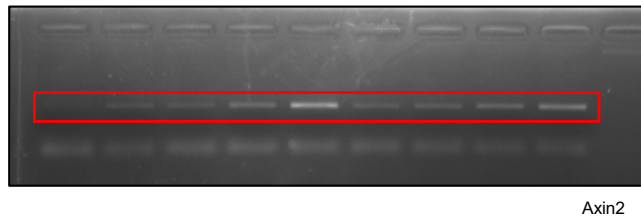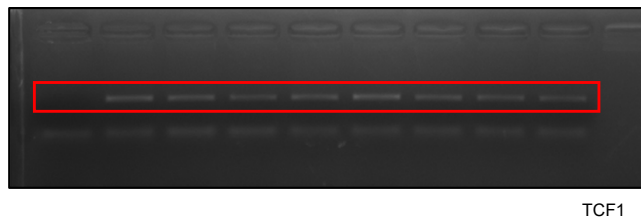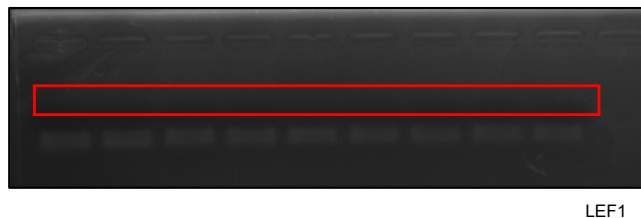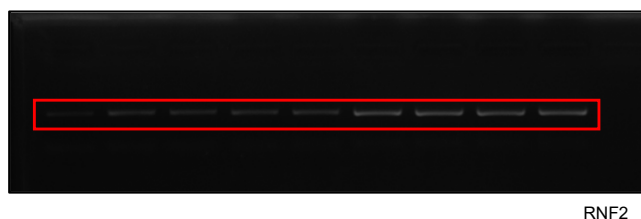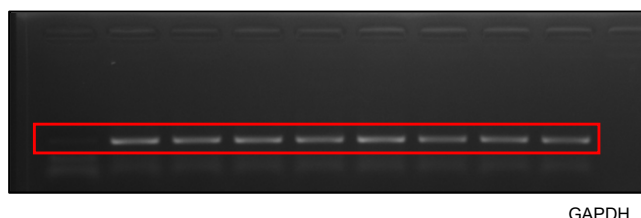

# Figure S15

## Figure S6a

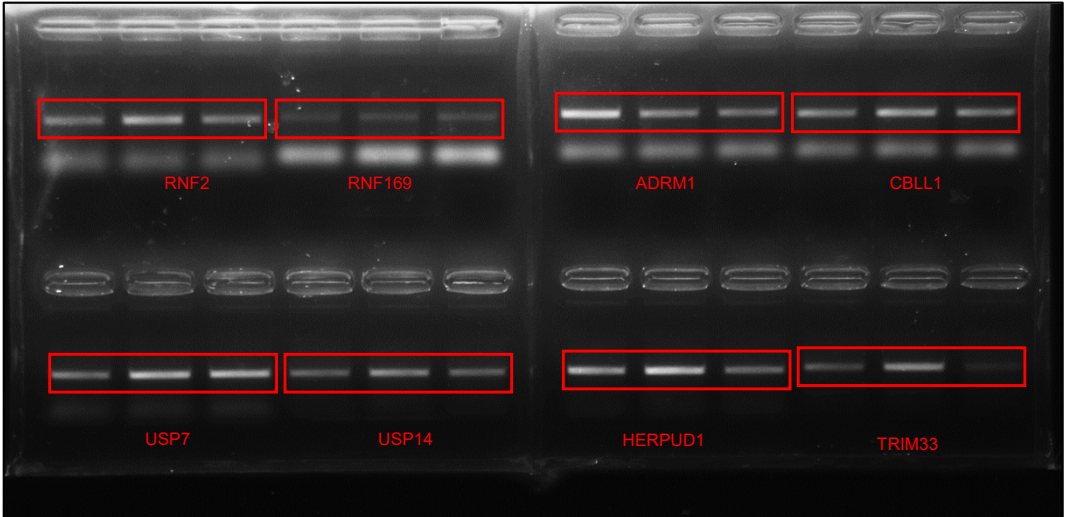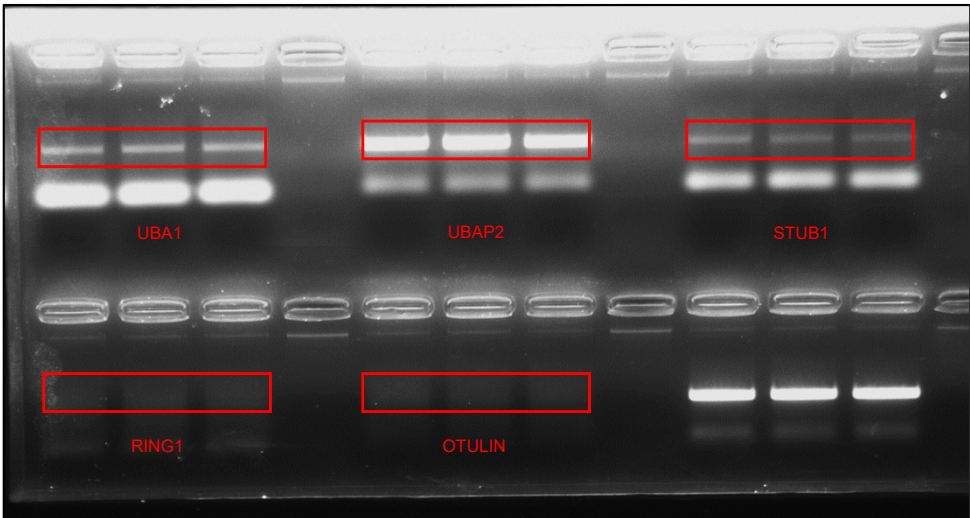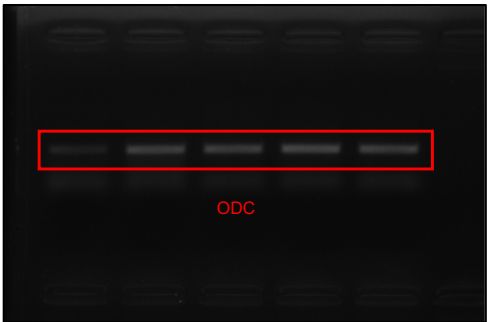

## Figure S6b

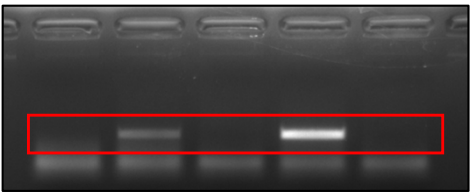

Chd

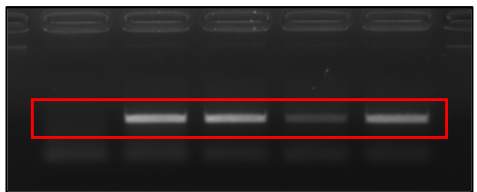

Msx1

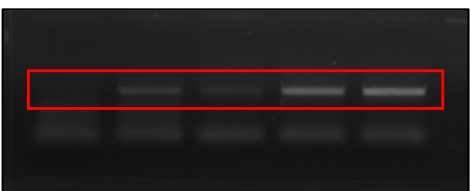

Xbra

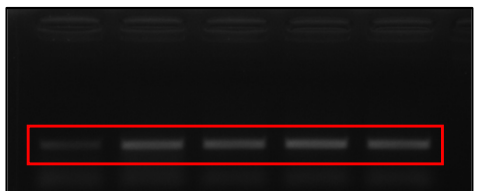

ODC



### **Figure S1. Validation of candidates from mass spectrometry result**

a. qRT-PCR was performed to validate knockdown efficiency of stable knockdown HeLa cells. The target mRNA levels were normalized by GAPDH. b. Mutation detection assay was performed using sgRNA based stable knockdown cell lines. Double band demonstrated the mutation of target sequence is occurred. c. TOPflash luciferase assay was performed using control HeLa cells. Cells were transfected with the indicated plasmids (50 ng TK-Renilla reporter; 200 ng TOPflash; 0.5 pCS2+TCF7L1; 1 ng pt-b-catenin) and then treated with 50 mM LiCl conditioned media for 16 hours. N = 3 independent experiments. d. TOPflash luciferase assay was performed using control HeLa cells and stable knock-down cell lines. Cells were transfected with the indicated plasmids (50 ng TK-Renilla reporter; 200 ng TOPflash) and then treated with 50 mM NaCl and LiCl conditioned media for 16 hours. n=3 independent experiments. e. Western blot analysis was performed using stable knockdown HeLa cells. Cells were treated with 50 mM LiCl for 16 hours. The cytosolic fraction was lysed with CB buffer, while the nuclear fraction was lysed with RIPA buffer following the initial lysis with CB buffer.

### **Figure S2. Loss of RNF2 in 4T1 cell line also showed increased TCF7L1 expression**

a. Western blot assay was performed using HeLa, HEK293T and 4T1. Endogenous TCF7L1 levels were determined by anti-TCF7L1. b. Western blot analysis of control 4T1 and shRNA-based RNF2 knockdown stable 4T1 cells. Endogenous TCF7L1 and RNF2 levels were determined using anti-TCF7L1 and anti-RNF2 antibodies, respectively. Quantification was performed using ImageJ software. c. Western blot analysis of control 4T1 cells and RNF2 knockdown stable 4T1 cells treated with 50 mM LiCl conditioned media for varying durations (30 min, 1 hr, 2 hrs, 4 hrs, 8 hrs, 16 hrs, and 24 hrs).

### **Figure S3. Both RNF2 overexpression and LiCl treatment accelerates TCF7L1 degradation**

a. In vitro ubiquitination assay was performed using control HeLa cells. TCF7L1-HA (6 µg), myc-RNF2 plasmids (6 µg) and Flag-Ub (2 µg) were introduced into cells. Cells were treated with 50 mM LiCl conditioned media for 16 hours followed by treatment with 10 µM MG132 for 12 hours, prior to harvesting. The cells were lysed with IP buffer and subjected to immunoprecipitation with the HA antibody. Ubiquitination levels were determined by anti-OctA.

### **Figure S4. Supplement data using HEK293T cells**

a. HEK293T cells were fixed and stained with anti-TCF7L1 (green) and anti-RNF2 (red) antibodies. Scale bar represents 10 µm. b. Western blot analysis of control HEK293T cells treated with 50mM LiCl conditioned media for varying durations (30min, 1 hr, 2hrs, 4 hrs, 8 hrs, 16 hrs and 24 hrs). c. RT-PCR analysis of total RNAs extracted from control HEK293T cells and RNF2-myc introduced HEK293T cells after treatment with LiCl (50 mM) conditioned media for 4, 8, and 12 hours. Samples were subjected to cDNA synthesis and RT-PCR analysis.

### **Figure S5. Wnt signaling activity is not affected by RNF2 overexpression**

a. RT-PCR analysis of total RNAs extracted from control HeLa cells and myc-RNF2 introduced HeLa cells after treatment with LiCl (50 mM) conditioned media for 4, 8, and 12 hours. Samples were subjected to cDNA synthesis and RT-PCR analysis. b. Quantification of RNF2 mRNA level using ImageJ from HeLa control cells and myc-RNF2 (6 µg) plasmid introduced HeLa cells after 50mM LiCl treatment for 4, 8, 12 hours. The intensity of RNF2 was normalized by that of GAPDH. N = 3 independent experiments.

### **Figure S6. TCF7L1 and RNF2 expression during *Xenopus laevis* development**

a. RT-PCR analysis was performed using *Xenopus laevis* stage 11 embryo. Animal cap(AC), Dorsal marginal zone (DMZ), Ventral marginal zone(VMZ) tissues were surgically dissected. The tissues were subjected to cDNA synthesis and RT-PCR analysis. b. RT-PCR analysis was performed using *Xenopus laevis* stage 11 embryo. Organizer, mesoderm and neural crest was determined by Chordin(Chd), Xbra, Msx1, respectively. c. RNA-seq data of TCF7L1 and RNF2 in Session et al. (2016) d. Tissue profile of TCF7L1 and RNF2 in Session et al. (2016) e. In situ hybridization was performed. Spatio-temporal expression pattern of TCF7L1 and RNF2 during *Xenopus* development. f. RNF2 overexpression was performed through RNF2 microinjection was performed. Capped RNF2 mRNA was injected in dorsal-animal side of 4-cell stage embryo.

### **Figure S7-S10. Full-sized images of western blot data from the main figures.**

### **Figure S11. Original images of immunofluorescence data from the main figures.**

### **Figure S12. Full-sized images of RT-PCR data from the main figures.**

### **Figure S13. Full-sized images of western blot data from the supplement figures.**

### **Figure S14-S15. Full-sized images of RT-PCR data from the supplement figures.**
