# Supplementary material for: RNF2 regulates Wnt/ß-catenin signaling via TCF7L1 destabilization
Source: PubMed Central journal article supplement (PMC10643375; doi:10.1038/s41598-023-47111-x), 2023-11-13
Supplement: 41598_2023_47111_MOESM2_ESM.pdf [file 41598_2023_47111_MOESM2_ESM.pdf]

# Supplementary Information

10 Tables

## **RNF2 regulates Wnt/ $\beta$ -catenin signaling via TCF7L1 destabilization**

Youngmu Koo<sup>1</sup>, Wonhee Han<sup>2</sup>, Byeong-Rak Keum<sup>1</sup>, Leila Lutz<sup>1</sup>, Sung Ho Yun<sup>3</sup>, Gun-Hwa Kim<sup>4</sup>, Jin-Kwan Han<sup>1,\*</sup>

1. Department of Life Sciences, Pohang University of Science and Technology, 77 Cheongam-Ro, Nam-Gu, Pohang, Gyeongbuk, 37673, Korea.

2. F. M. Kirby Neurobiology Center, Boston Children's Hospital, Department of Neurology, Harvard Medical School, Boston, MA 02115, USA.

3. Center for Research Equipment, Korea Basic Science Institute, Cheongju 28119, Republic of Korea

4. Research Center for Bioconvergence Analysis, Korea Basic Science Institute, Cheongju 28119, Republic of Korea

\* Corresponding author: [jkh@postech.ac.kr](mailto:jkh@postech.ac.kr)

**Table 1**

| Genes          | Full name                                                                                     | Role                                  | Rank |
|----------------|-----------------------------------------------------------------------------------------------|---------------------------------------|------|
| <b>TRIM33</b>  | E3 ubiquitin-protein ligase TRIM33                                                            | E3 ligase                             | 854  |
| <b>RNF2</b>    | E3 ubiquitin-protein ligase RING2                                                             | E3 ligase                             | 39   |
| <b>RNF169</b>  | E3 ubiquitin-protein ligase RNF169                                                            | E3 ligase                             | 203  |
| <b>CBLL1</b>   | E3 ubiquitin-protein ligase Hakai                                                             | E3 ligase                             | 980  |
| <b>RING1</b>   | Isoform 2 of E3 ubiquitin-protein ligase RING1                                                | E3 ligase                             | 29   |
| <b>STUB1</b>   | E3 ubiquitin-protein ligase CHIP                                                              | E3 ligase                             | 1014 |
| <b>USP7</b>    | Ubiquitin carboxyl-terminal hydrolase 7                                                       | DUB                                   | 134  |
| <b>USP14</b>   | Isoform 3 of Ubiquitin carboxyl-terminal hydrolase 14                                         | DUB                                   | 1126 |
| <b>OTULIN</b>  | Ubiquitin thioesterase otulin                                                                 | DUB                                   | 1390 |
| <b>UBA1</b>    | Ubiquitin-like modifier-activating enzyme 1                                                   | E1 enzyme                             | 585  |
| <b>HERPUD1</b> | Homocysteine-responsive endoplasmic reticulum-resident ubiquitin-like domain member 1 protein | ER protein with Ubiquitin like domain | 16   |
| <b>UBAP2</b>   | Ubiquitin-associated protein 2                                                                | Ubiquitin associated protein2         | 509  |
| <b>UBAP2L</b>  | Isoform 5 of Ubiquitin-associated protein 2-like                                              | Ubiquitin associated protein2 Like    | 1459 |
| <b>URM1</b>    | Ubiquitin-related modifier 1                                                                  | Ubiquitin like protein                | 1356 |
| <b>ADRM1</b>   | Proteasomal ubiquitin receptor ADRM1                                                          | Ubiquitin receptor                    | 269  |

**Table 2**

| Candidate | Role      | Rank (1470) |
|-----------|-----------|-------------|
| RING1     | E3 ligase | 29          |
| RNF2      | E3 ligase | 39          |
| RNF169    | E3 ligase | 203         |
| TRIM33    | E3 ligase | 854         |
| CBLL1     | E3 ligase | 980         |
| STUB1     | E3 ligase | 1014        |

**Table 3**

| Genes   | Target sequence       | Primer sequences (5'→3')                                    |
|---------|-----------------------|-------------------------------------------------------------|
| STUB1   | GAAGAGGAAGAAGCGAGACAT | CCGGGAAGAGGAAGAAGCGAGACATCTCGAGATGTCTCGCTTCTTCTCTCTTTTG     |
|         |                       | AATTCAAAAAGAAGAGGAAGAAGCGAGACATCTCGAGATGTCTCGCTTCTTCTCTCTC  |
| URM1    | GCTCCTGTTTGACGGTATTAA | CCGGGCTCCTGTTTGACGGTATTAACCTCGAGTTAATACCGTCAAACAGGAGCTTTTTG |
|         |                       | AATTCAAAAAGCTCCTGTTTGACGGTATTAACCTCGAGTTAATACCGTCAAACAGGAGC |
| UBAP2L  | GCCAATACTGATGATAACTAT | CCGGGCCAATACTGATGATAACTATCTCGAGATAGTTATCATCAGTATGGCTTTTTG   |
|         |                       | AATTCAAAAAGCCAATACTGATGATAACTATCTCGAGATAGTTATCATCAGTATGGC   |
| UBAP2   | CGTGGAACAACAACCGGAAA  | CCGGCGTGGAACAACAACCGGAAACTCGAGTTCCGGTTGTTGTTCCACGTTTTTG     |
|         |                       | AATTCAAAAACGTGGAAACAACAACCGGAAACTCGAGTTCCGGTTGTTGTTCCACG    |
| RNF169  | ATCAACTCCACGCAACCTAAA | CCGGATCAACTCCACGCAACCTAACTCGAGTTAGGTTGCGTGGAGTTGATTTTTG     |
|         |                       | AATTCAAAAATCAACTCCACGCAACCTAACTCGAGTTAGGTTGCGTGGAGTTGAT     |
| ADRM1   | CAGACGGACGACTCGCTTATT | CCGGCAGACGGACGACTCGCTTATTCTCGAGAATAAGCGAGTCGTCCTGTTTTG      |
|         |                       | AATTCAAAAACAGACGGACGACTCGCTTATTCTCGAGAATAAGCGAGTCGTCCTG     |
| UBA1    | CCACTGCCTTCTACCTTGTTT | CCGGCCACTGCCTTCTACCTTGTTTCTCGAGAAACAAGGTAGAAGGCAGTGGTTTTG   |
|         |                       | AATTCAAAAACCACTGCCTTCTACCTTGTTTCTCGAGAAACAAGGTAGAAGGCAGTGG  |
| RNF2    | GCCAGGATCAACAAGCACAAT | CCGGGCCAGGATCAACAAGCACAATCTCGAGATTGTGCTTGTGATCCTGGCTTTTTG   |
|         |                       | AATTCAAAAAGCCAGGATCAACAAGCACAATCTCGAGATTGTGCTTGTGATCCTGGC   |
| RING1   | CTGGAGCTGGTGAATGAGAAA | CCGGCTGGAGCTGGTGAATGAGAAAACCTCGAGTTTCTATTACCAGCTCCAGTTTTG   |
|         |                       | AATTCAAAAACCTGGAGCTGGTGAATGAGAAAACCTCGAGTTTCTATTACCAGCTCCAG |
| HERPUD1 | CCTCCTCTGACGTTGTAAAT  | CCGGCCTCCTCTGACGTTGTAAATCTCGAGATTACAACGTCAGGAGGAGTTTTG      |
|         |                       | AATTCAAAAACCTCCTCTGACGTTGTAAATCTCGAGATTACAACGTCAGGAGGAGG    |
| OTULIN  | CCCTTAGTAGTAACGGGTTT  | CCGGCCTTAGTAGTAACGGGTTTCTCGAGAAACCGTTACTACTAAAGGTTTTG       |
|         |                       | AATTCAAAAACCTTTAGTAGTAACGGGTTTCTCGAGAAACCGTTACTACTAAAGGG    |
| USP14   | CCCAAGATTCAGCAGTCAGAT | CCGGCCCAAGATTCAGCAGTCAGATCTCGAGATCTGACTGCTGAATCTGGGTTTTG    |
|         |                       | AATTCAAAAACCCAAGATTCAGCAGTCAGATCTCGAGATCTGACTGCTGAATCTGGG   |
| CBLL1   | TCATATCAACCATCGCCATAT | CCGGTCATATCAACCATCGCCATATCTCGAGATATGGCGATGGTTGATATGTTTTG    |
|         |                       | AATTCAAAAATCATATCAACCATCGCCATATCTCGAGATATGGCGATGGTTGATATGA  |
| TRIM33  | TACTTTCCAGTTGCGTCATAT | CCGGTACTTTCCAGTTGCGTCATATCTCGAGATATGACGCAACTGGAAAGTATTTTTG  |
|         |                       | AATTCAAAAATACTTTCCAGTTGCGTCATATCTCGAGATATGACGCAACTGGAAAGTA  |
| USP7    | CCTGGATTTGTGGTTACGTTA | CCGGCCTGGATTTGTGGTTACGTTACTCGAGTAACGTAACCACAAATCCAGTTTTG    |
|         |                       | AATTCAAAAACCTGGATTTGTGGTTACGTTACTCGAGTAACGTAACCACAAATCCAGG  |

**Table 4**

| Genes   | Primer sequences (5'→3') |
|---------|--------------------------|
| UBAP2L  | TGAGCCACAGTGAGGAGATTCC   |
|         | AGATTCGCCTCACTCTCCACAC   |
| OTULIN  | GACAGCTTCTGAGGAACACCT    |
|         | TCCGTGTTGTACTTGGAGAGCC   |
| URM1    | CATCGAGTCACTTTGCCTGGAC   |
|         | ACGCTGTCTCCCTGGATGAACA   |
| USP14   | GGGAAATGGCTTCAGCGCAGTA   |
|         | CACCTTTCTCGGCAAACCTGTGG  |
| HERPUD1 | CCAATGTCTCAGGGACTTGCTTC  |
|         | CGATTAGAACCAGCAGGCTCCT   |
| CBLL1   | AACAGGATGCCTGCAAAGGCTC   |
|         | GGTGTCCAGGAAATCTTCGCTG   |
| ADRM1   | AAGCGGAAAGGGCTGGTGTACA   |
|         | CCGCTTGAACCTCACAGTCGTCA  |
| UBA1    | TCCTCACAGAGGACAAGTGCCCT  |
|         | CTTGAGCAGCTCACAGCCAATG   |
| RNF2    | CAGTCACAGCATTGAGGAAGGAC  |
|         | GCTTCTGATTGCTATGTGTGGA   |

**Table 5**

| Genes  | Target sequence      | Primer sequences (5'→3')   |
|--------|----------------------|----------------------------|
| RNF2   | TGAGTTACAACGAACACCTC | CACCGTGAGTTACAACGAACACCTC  |
|        |                      | AAACGAGGTGTTTCGTTGTAACCTAC |
| RNF169 | GAGTACTCGGGCCTCTTCCG | CACCGGAGTACTCGGGCCTCTTCCG  |
|        |                      | AAACCGGAAGAGGCCCGAGTACTCC  |
| STUB1  | GAATCGCGAAGAAGAAGCGC | CACCGGAATCGCGAAGAAGAAGCGC  |
|        |                      | AAACGCGCTTCTTCTTCGCGATTCC  |
| TRIM33 | GTGTTGTGTACCGATACTAC | CACCG CATCATAGCCATGTGTTGTG |
|        |                      | AAACCACAACACATGGCTATGATGC  |
| USP7   | AGATGTATGATCCCAAACG  | CACCG AGATGTATGATCCCAAACG  |
|        |                      | AAACCGTTTGGGATCATACTCTC    |
| RING1  | TAAGATCTATCCTAGCCGGG | CACCG TAAGATCTATCCTAGCCGGG |
|        |                      | AAACCCCGGCTAGGATAGATCTTAC  |

**Table 6**

| Genes  | Primer sequences (5'→3') |
|--------|--------------------------|
| RNF2   | AAACGGAACTCAACCATTAAGC   |
|        | TTATTCACCACTGTTACCCAG    |
| RNF169 | AGGTCTGAGGAGAACCCTCTTT   |
|        | CAACAGCGAAGGTCCAGAAG     |
| STUB1  | GCTGGAGATGGAGAGCTATGAT   |
|        | ATGAGCCTGGAGAGGTAGGAGT   |
| TRIM33 | GCCCACTTCTTTGTTTCTTCTG   |
|        | GCATTTGCCATAGTTGCTGTAG   |
| USP7   | TTGTGCTGAGTGTGGATCTT     |
|        | GAAGGTAAGTGCACGAAGGACT   |
| RING1  | CAGGAACAAGGAGTGTCTTACC   |
|        | CCATCAGTTCTGCTTCTCTCCT   |

**Table 7**

| Antibody                           | Catalog   | Company                   |
|------------------------------------|-----------|---------------------------|
| β-Actin(C4)                        | sc-47778  | Santa cruz                |
| TCF3(E-2)                          | sc-166411 | Santa cruz                |
| TCF4(H-7)                          | sc-271287 | Santa cruz                |
| c-myc(9E10)                        | sc-40     | Santa cruz                |
| HA-tag(F-7)                        | sc-7392   | Santa cruz                |
| β-Catenin(H-102)                   | sc-7199   | Santa cruz                |
| Lamin B1(B-10)                     | sc-374015 | Santa cruz                |
| OctA(H-5)                          | sc-166355 | Santa cruz                |
| Active-β-Catenin(8E7)              | 05-665    | Sigma-Aldrich             |
| K48-linkage Specific Polyubiquitin | #4289     | Cell Signaling Technology |
| RING1B (D22F2)                     | #5694     | Cell Signaling Technology |

**Table 8**

| Genes  | Primer sequences (5'→3') |
|--------|--------------------------|
| RNF2   | GTCGTGATGAGTATGAAGCTC    |
|        | TTGTTACTAGGGCCTGCTTC     |
| TCF7L1 | AGAACCAGAGCAGCAGCTC      |
|        | TTCATCTGCAGGTAGGTGCG     |
| c-myc  | AGAAGCTGGCCTCCTACCA      |
|        | GTCGAGGAGAGCAGAGAATC     |
| Axin2  | GGCATCAAGAAGCAGCAGAT     |
|        | TTTGCACTTGAAGTCGGCAC     |
| TCF1   | CCGTCTACTCCGCCTTCAAT     |
|        | AGGTCAGGGAGTAGAAGCCA     |
| LEF1   | ACGGAAAGCATCCAGATGGA     |
|        | ATGTGTGACGGGTGTGATCC     |
| GAPDH  | GTCTCCTCTGACTTCAACAGCG   |
|        | ACCACCCTGTTGCTGTAGCCAA   |

**Table 9**

| Genes   | Primer sequences (5'→3')  |
|---------|---------------------------|
| USP7    | CATTGACTATGTAGCAGTGGAG    |
|         | TTTGCCTTCTCCTTAGGATTCAA   |
| RNF169  | CCAAGTAGTGAATATGCAAAATGG  |
|         | CTAATTTGCGCCGGCCGTG       |
| RNF2    | GGCGCAAGCAGTGCAGAC        |
|         | CATCAAAGTTCGGATCTGGCC     |
| USP14   | TGCCCCTCTACTCAGTGAAC      |
|         | GTGTTACCGAGGTTTGTGAGG     |
| ADRM1   | GTCATCTGGAGCGCTGTTTC      |
|         | TCAGTCTTGGGCTCCTGCAT      |
| TRIM33  | GGCGGATAACAAAGGAGGAG      |
|         | GCTTGGGCTCAGTGTCCC        |
| HERPUD1 | ATACGGAGCCCTAGCCTTAG      |
|         | CTAATGCCATCAGCCTCAGG      |
| CBLL1   | GATAATGATCTACAAGGCACTAAC  |
|         | AGGCAGGCCACATTTGTCAC      |
| RING1   | CGCCAGTCTCGCGTGATG        |
|         | AATCTGTGGAGACATTCCTTGG    |
| UBA1    | GTCCAGCTCTCCGCTGTC        |
|         | GAAAGATCAGTCCACTCCGTG     |
| UBAP2   | ATGATGACTTCGGTGGGAAATG    |
|         | GGAAGTCTCTTTGCCAATGCTT    |
| STUB1   | GAAAGGAAAGGAGGAGGGTG      |
|         | TCTCTAGTTCCATCTGACACTG    |
| OTULIN1 | CACCAGAGTAGCTAAAATGAAAATC |
|         | GCTGAGAGCACTCTATGGAAC     |

**Table 10**

| Genes  | Primer sequences (5'→3') |
|--------|--------------------------|
| TCF7L1 | ATCTTGGAGGGCATTACTTGCC   |
|        | TGGGACTAATGTTCCCAGAGGA   |
| RNF2   | CAACGAAAGAGTGCTTGCATCG   |
|        | TGTATCGAGTCTGTGCACTGTC   |

**Table 1. Candidate genes from mass spectrometry result**

**Table 2. Six E3 ligase candidate genes from the mass spectrometry data**

**Table 3. Primers used for shRNA**

**Table 4. Primers used for knockdown validation**

**Table 5. Primers used for making gRNA included PX459 vector**

**Table 6. Primers used for mutation detection**

**Table 7. Antibody information used for western blot**

**Table 8-9. Primers used for RT-PCR**

**Table 10. Primers used for cloning probe**
